# Supplementary material for: Characterization of Cell-Bound CA125 on Immune Cell Subtypes of Ovarian Cancer Patients Using a Novel Imaging Platform
Source: MDPI journal article supplement (doi:10.3390/cancers13092072), 2021-04-25
Supplement: s1 [file s1]

*Supplementary Table 1. Percentage of cells that have low, medium, and high nanoparticle binding in serous invasive ovarian cancer patients. Cutoff thresholds of 5 PNPs/cell and 10 PNPs/cell were used to determine medium and high binding.*

| <b>Cell Type</b> | <b>Low<br/>(&lt;5 PNPs/cell)</b> | <b>Medium<br/>(5≤PNPs/cell &lt;10)</b> | <b>High<br/>(≥ 10 PNPs/cell)</b> |
|------------------|----------------------------------|----------------------------------------|----------------------------------|
| <b>B-Cell</b>    | 40.66                            | 7.59                                   | 51.73                            |
| <b>NK-Cell</b>   | 85.19                            | 5.21                                   | 9.59                             |
| <b>T-Cell</b>    | 82.05                            | 5.59                                   | 12.35                            |
| <b>Monocyte</b>  | 9.82                             | 3.96                                   | 86.21                            |
| <b>NK-T-Cell</b> | 71.15                            | 4.83                                   | 24.00                            |
